# Supplementary material for: The INSPIRE Population Survey: development, dissemination and respondent characteristics
Source: PubMed Central journal article supplement (PMC8223353; doi:10.1186/s12874-021-01329-3), 2021-06-24
Supplement: 12874_2021_1329_MOESM1_ESM.pdf [file 12874_2021_1329_MOESM1_ESM.pdf]

## Phase 1: Development

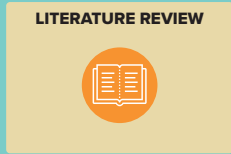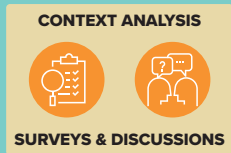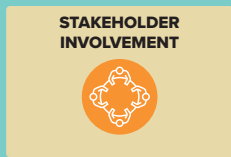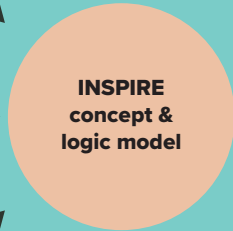

## Phase 2: Feasibility/Piloting

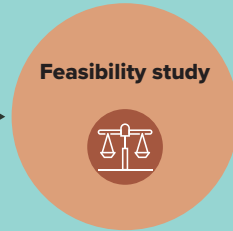

## Phase 3: Evaluation

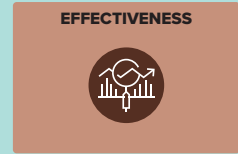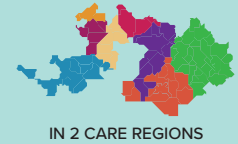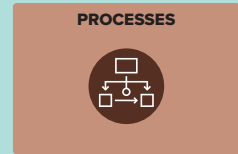

**IMPLEMENTATION SCIENCE COMPONENTS**  
(e.g. stakeholder involvement, implementation strategies, implementation outcomes)
